# Supplementary material for: Model-based analysis of DNA replication profiles: predicting replication fork velocity and initiation rate by profiling free-cycling cells
Source: HighWire-hosted journal article supplement (doi:10.1101/gr.205849.116), 2016-12-27
Supplement: Supplemental_TableS1.docx [file Supplemental_TableS1.docx]

**Table S1 – strains list**

| ***Strain*** | ***Genotype*** | ***Source*** |
| --- | --- | --- |
| *BY4741* | *MAT***a** *his3-**1 leu2-**0 met15-**0 ura3-**0* |  |
| *mrc1* | *BY4741 mrc1NAT* | This study |
| *mrc1* | MATa trp1-1 ura3-1 his3-11,15 leu2-3,112 ade2-1 can1-100 mrc1::his5+ | (Osborn and Elledge 2003) |
| *clb5* | BY4741 clb5kanMX | (Giaever et al. 2002) |
| *sic1* | BY4741 sic1kanMX | (Giaever et al. 2002) |
| *dia2* | BY4741 dia2kanMX | (Giaever et al. 2002) |
| *dpb3* | BY4741 dpb3kanMX | (Giaever et al. 2002) |
| *dpb4* | BY4741 dpb4kanMX | (Giaever et al. 2002) |
| *met7* | BY4741 met7kanMX | (Giaever et al. 2002) |
| *rif1* | BY4741 rif1kanMX | (Giaever et al. 2002) |
| *rif1* | BY4741 rif1kanMX | This study |
| *ctf8* | BY4741 ctf8kanMX | (Giaever et al. 2002) |
| *ctf18* | BY4741 ctf18kanMX | (Giaever et al. 2002) |
| *ctf19* | BY4741 ctf19kanMX | This study |
| *ctf3* | BY4741 ctf3kanMX | (Giaever et al. 2002) |
| *mcm16* | BY4741 mcm16kanMX | (Giaever et al. 2002) |
| *mcm21* | BY4741 mcm21kanMX | (Giaever et al. 2002) |
| *mcm22* | BY4741 mcm22kanMX | (Giaever et al. 2002) |
| *nkp1* | BY4741 nkp1kanMX | (Giaever et al. 2002) |
| *nkp2* | BY4741 nkp2kanMX | (Giaever et al. 2002) |
| *chl4* | BY4741 chl4kanMX | (Giaever et al. 2002) |
| *yku80* | BY4741 yku80kanMX | (Giaever et al. 2002) |
| *rpd3* | BY4741 rpd3kanMX | (Giaever et al. 2002) |
| *rpd3* | BY4741 rpd3kanMX | This study |
| *sir2* | BY4741 sir2kanMX | (Giaever et al. 2002) |
| *sir2* | BY4741 sir2kanMX | This study |
| *sir3* | BY4741 sir3kanMX | (Giaever et al. 2002) |
| *sir4* | BY4741 sir4kanMX | (Giaever et al. 2002) |
| *sin3* | BY4741 sin3kanMX | (Giaever et al. 2002) |
| *SSDD rpd3* | *W303a rpd3Δ::HphMX trp1::SLD2-pGAL1-10-DPB11::TRP1*  *ura3::SLD3-pGAL1-10-DBF4::URA3* | (Mantiero et al. 2011) |
| TetO7-*POL2* | *R1158, POL2pr:: kanMX-tet* | (Mnaimneh et al. 2004) |
| TetO7-*POL12* | R1158, POL12pr:: kanMX-tet | (Mnaimneh et al. 2004) |
| TetO7-*POL30* | R1158, POL30pr:: kanMX-tet | (Mnaimneh et al. 2004) |
| TetO7-*SLD5* | R1158, SLD5pr:: kanMX-tet | (Mnaimneh et al. 2004) |
| TetO7-*DPB11* | R1158, DPB11pr:: kanMX-tet | (Mnaimneh et al. 2004) |
| TetO7-*CDC45* | R1158, CDC45pr:: kanMX-tet | (Mnaimneh et al. 2004) |
| SIC1OE | BY4741 kanMX *pTEF1-SIC1* | This study |
| *fkh1,2C* | Described in details in (Knott et al., 2012) | (Knott et al., 2012) |
| *Fkh1* | BY4741 fkh1kanMX | (Giaever et al. 2002) |
